# Supplementary material for: Novel Antibody–Peptide Binding Assay Indicates Presence of Immunoglobulins against EGFR Phospho-Site S1166 in High-Grade Glioma
Source: MDPI journal article supplement (doi:10.3390/ijms23095061), 2022-05-02

# Supplemental Figure S2: LC-MS Peak plots of GFAP applicability experiment

**Figure S2A: GFAP peptide RS[+80]YVSSGEMMVGGGLAPGR**

LC-MS chromatograms (PRM) of GFAP phospho-peptides RS[+80]YVSSGEMMVGGGLAPGR measured with PRM in the IgG-bound (IB), unbound (UB), and filter bound (FB) fraction of the Ab-peptide binding assay. Colors in the chromatogram plots indicate the various fragments detected and used for quantification. Grey peak background indicates if a positive peak detection on basis of at least 3 fragments was achieved.

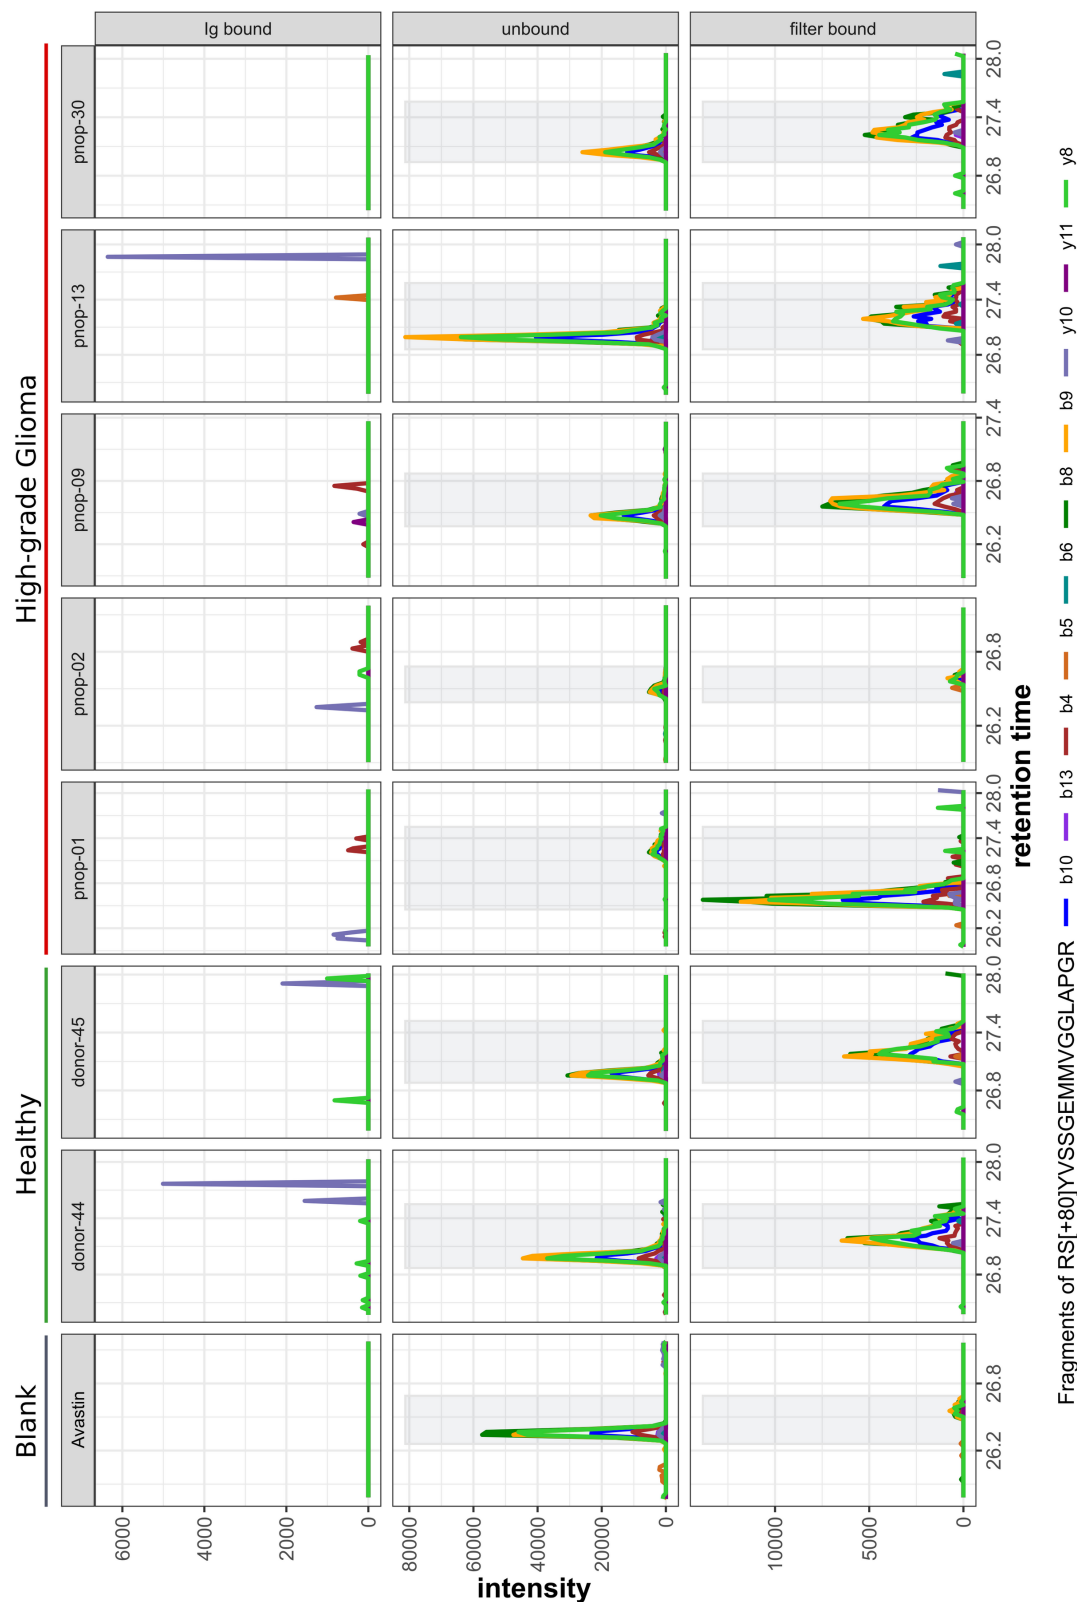

**Figure S2B: GFAP peptide EAAS[+80]YQEALAR**

LC-MS chromatograms (PRM) of GFAP phospho-peptides EAAS[+80]YQEALAR measured with PRM in the IgG-bound (IB), unbound (UB), and filter bound (FB) fraction of the Ab-peptide binding assay. Colors in the chromatogram plots indicate the various fragments detected and used for quantification. Grey peak background indicates if a positive peak detection on basis of at least 3 fragments was achieved.

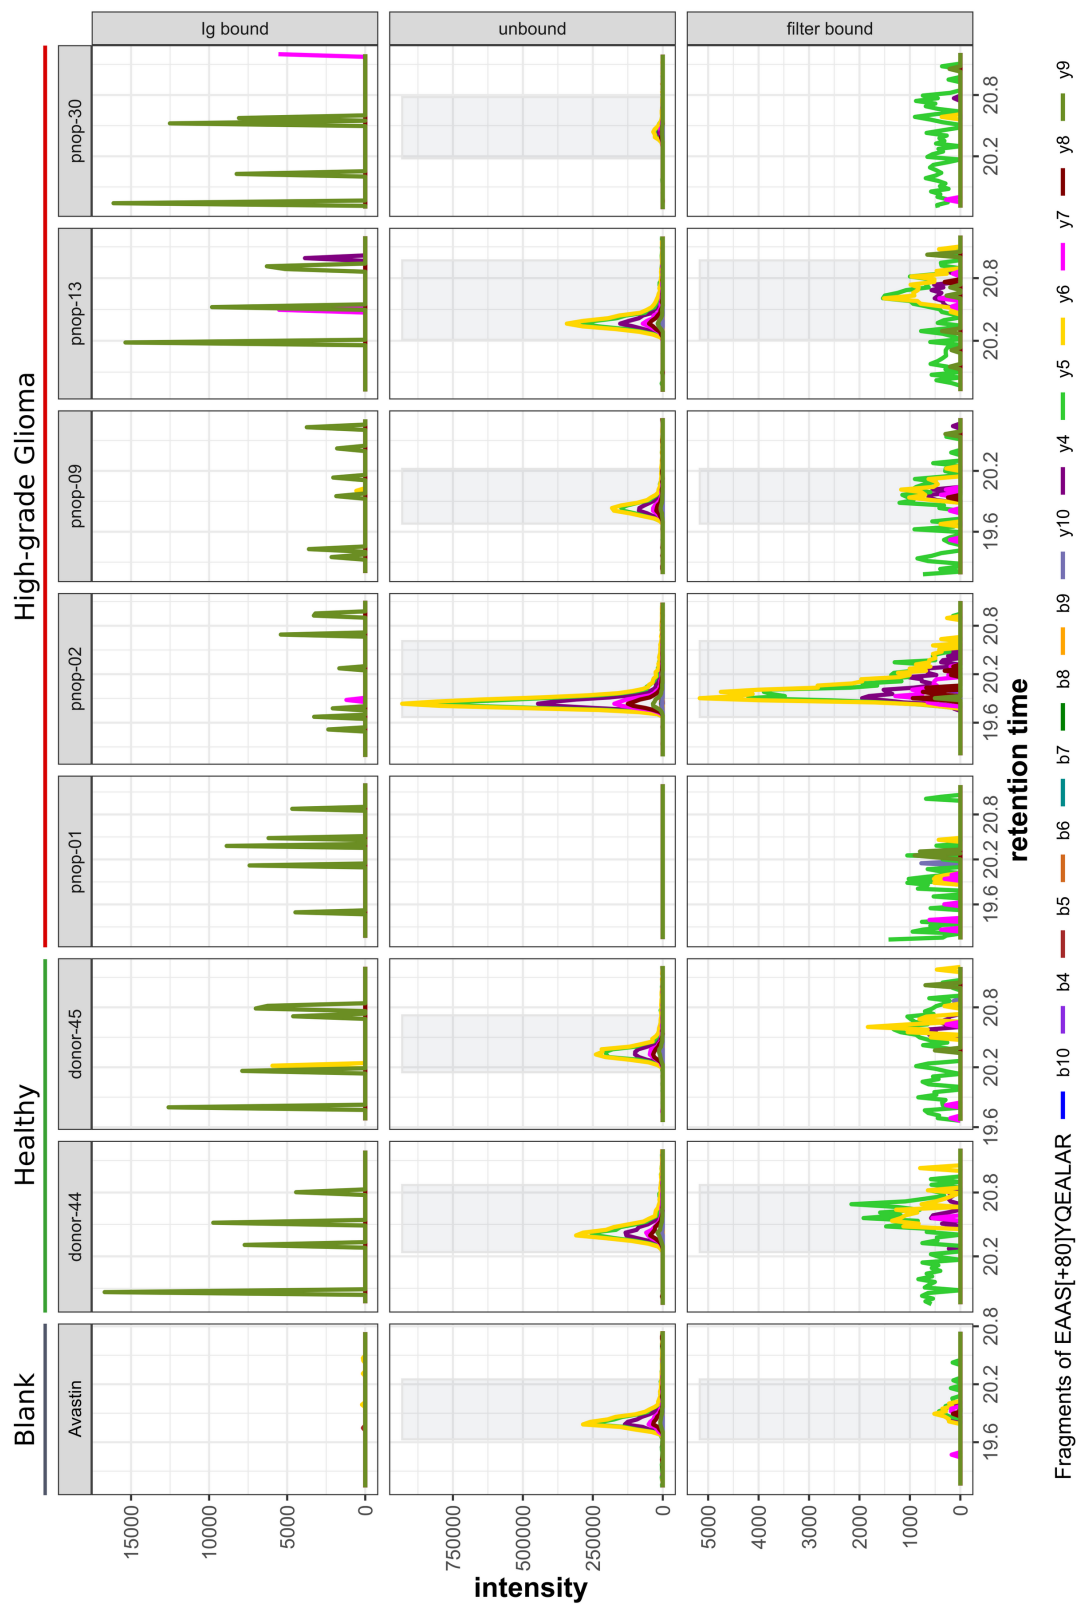

**Figure S2C: GFAP peptide SVS[+80]EGHLK**

LC-MS chromatograms (PRM) of GFAP phospho-peptides SVS[+80]EGHLK measured with PRM in the IgG-bound (IB), unbound (UB), and filter bound (FB) fraction of the Ab-peptide binding assay. Colors in the chromatogram plots indicate the various fragments detected and used for quantification. Grey peak background indicates if a positive peak detection on basis of at least 3 fragments was achieved.

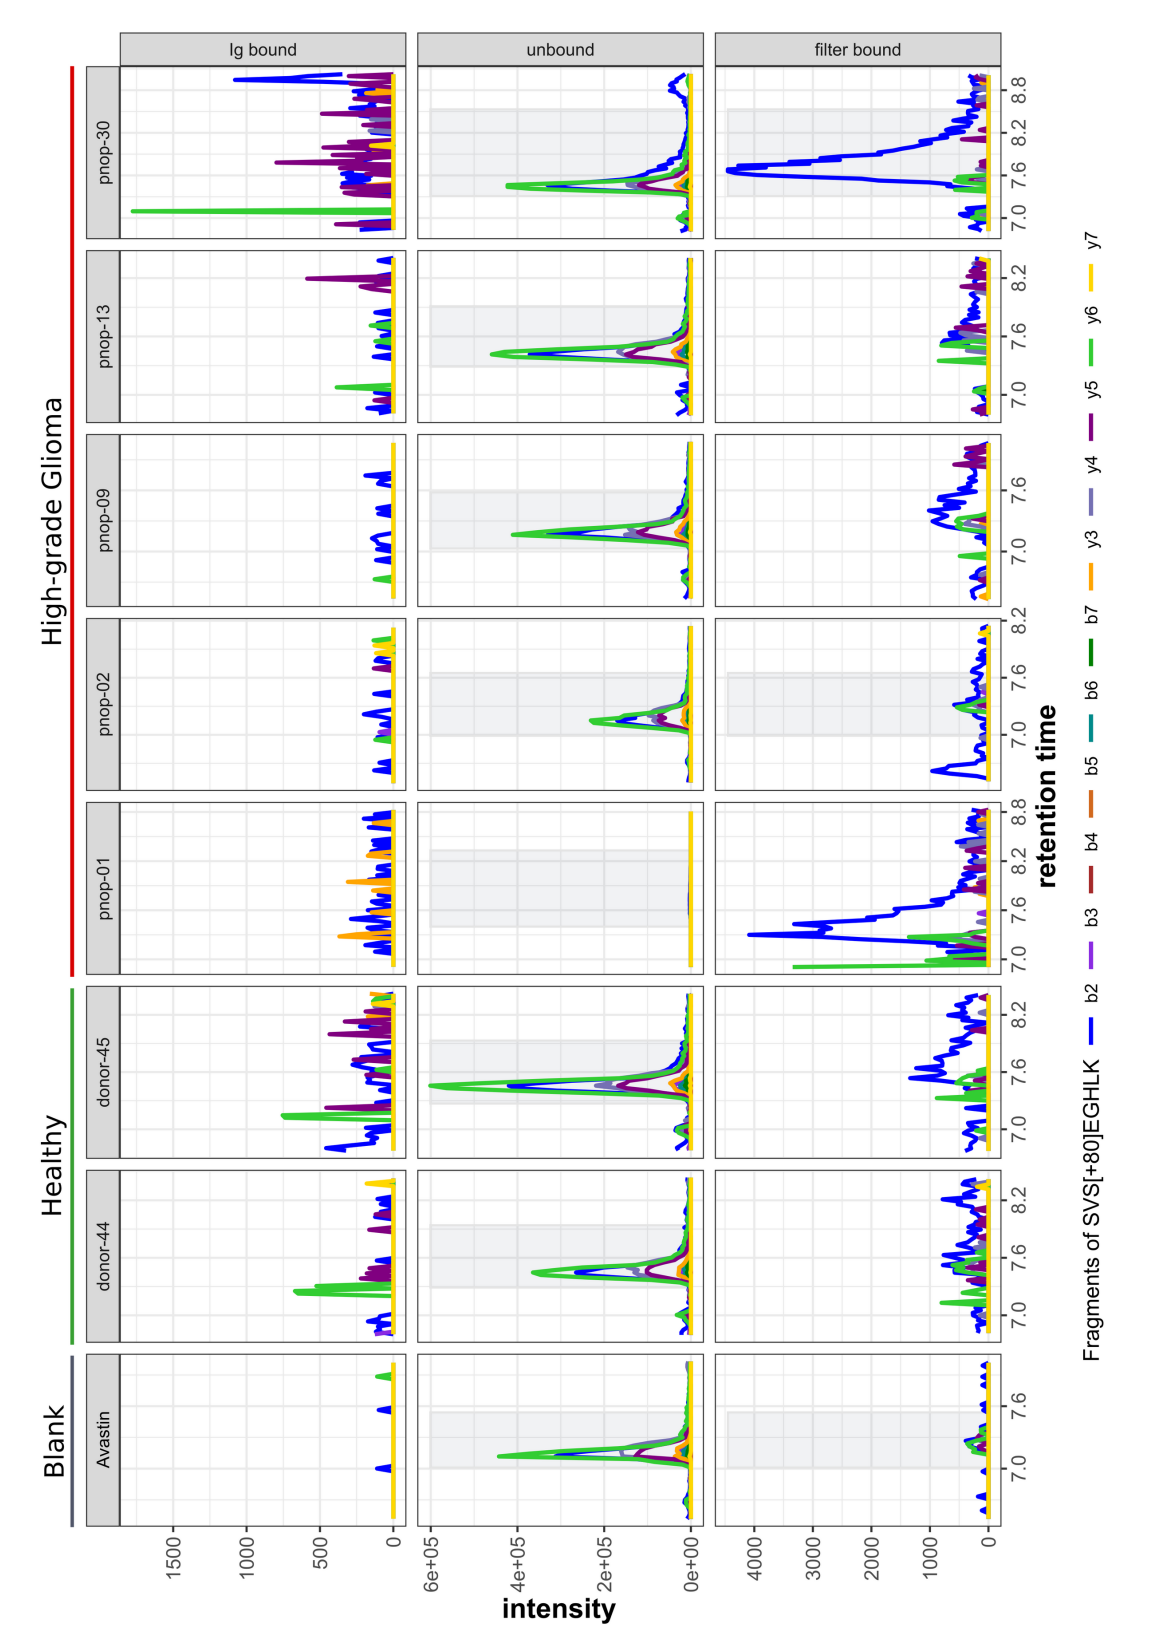

Supplement: s1 [file s1]
