# Supplementary material for: Novel Antibody–Peptide Binding Assay Indicates Presence of Immunoglobulins against EGFR Phospho-Site S1166 in High-Grade Glioma
Source: Int J Mol Sci. 2022 May 2;23(9):5061. doi: 10.3390/ijms23095061 (PMC9100080; doi:10.3390/ijms23095061)
Supplement: Supplementary file 1 [file ijms-23-05061-s001.zip › a171-SupplTable-S1.v220328.xlsx]

## Sheet: S1 - GBM tissue
Supplemental Table S1: Clinical and expression data of GBM tissues used for peptide libraries
Sample name	GBM-11
Age	55
Gender	male
Diagnosis	Glioblastoma
Tumor location	right parieto-occipital
1p/19q loss	19q partial imbalance
Additional genetic alterations	ATRX exon 31, TP53 exon 5, partial imbalance 6p, 7 and 19q. Partial loss 9p, imbalance 9q. Homozygous deletion CDKN2A & 2B. No EGFR Amplifcation.

## Sheet: S2 - targeted peptide antigens
Supplemental Table S2: Table of peptide antigens used with parallel reaction monitoring (PRM) parameters
#	Target	Peptidesequence	m/z	z	t start(min)	t stop(min)	HCD Collision Energy (%)	used for analysis
1	α-casein	HPIKHQGLPQEVLNENLLR	745.75	3	0	32	27	yes
2	α-casein	HPIK[+166]HQGLPQEVLNENLLR	801.084	3	0	32	27	yes
3	α-casein	HQGLPQEVLNENLLR	587.32	3	0	32	27	yes
4	α-casein	FFVAPFPEVFGK	692.869	2	0	32	27	yes
5	α-casein	FFVAPFPEVFGKEK	547.961	3	0	32	27	yes
6	α-casein	FFVAPFPEVFGK[+166]EK	904.438	2	0	32	27	yes
7	α-casein	EKVNELSK	473.764	2	0	32	27	yes
8	α-casein	EK[+166]VNELSK	556.765	2	0	32	27	yes
9	α-casein	HIQKEDVPSER	446.565	3	0	32	27	yes
10	α-casein	HIQK[+166]EDVPSER	752.345	2	0	32	27	yes
11	α-casein	EDVPSERYLGYLEQLLR	694.029	3	0	32	27	no
12	α-casein	YLGYLEQLLR	634.356	2	0	32	27	yes
13	α-casein	ITVDDKHYQK	416.219	3	0	32	27	yes
14	α-casein	ITVDDK[+166]HYQK	706.826	2	0	32	27	yes
15	α-casein	LTEEEKNR	509.762	2	0	32	27	yes
16	α-casein	LTEEEK[+166]NR	592.763	2	0	32	27	yes
17	α-casein	FALPQYLK	490.284	2	0	32	27	yes
18	α-casein	FALPQYLK[+166]	573.285	2	0	32	27	no
19	α-casein	AMKPWIQPK	549.81	2	0	32	27	yes
20	α-casein	AMK[+166]PWIQPK	632.811	2	0	32	27	no
21	α-casein	TKVIPYVR	488.303	2	0	32	27	yes
22	α-casein	TK[+166]VIPYVR	571.304	2	0	32	27	yes
23	EGFR	LGPGTRLS[+80]LAR	407.555	3	0	32	18	no
24	EGFR	GSHQIS[+80]LDNPDYQQDFFPK	772.67	3	0	32	20	yes
25	GFAP	SVS[+80]EGHLK	468.713	2	0	13.95	27	yes
26	GFAP	EAAS[+80]YQEALAR	644.782	2	0	21.2	27	yes
27	GFAP	LGPGTRLS[+80]LAR	407.555	3	0	22.2	27	no
28	GFAP	ITIPVQT[+80]FSNLQIR	570.638	3	13.95	23.75	27	no
29	GFAP	KIES[+80]LEEEIR	663.321	2	21.2	32	27	no
30	GFAP	QLQS[+80]LTC[+57.021464]DLESLR	821.879	2	22.2	32	27	no
31	GFAP	RSYVSS[+80]GEMMVGGLAPGR	645.293	3	23.75	32	27	yes

## Sheet: S3 - background experiment
Supplemental Table S3: List of 127 peptides found in Ab-peptide binding assay background experiment. Assignments: Blank = peptide sequence was found in the IgG bound fraction of the blank, independently they were also found in a plasma sample; GBM = exclusivelyin GBM plasma; Donor = exclusively in donor plasma; GBM|Donor = in both plasma samples. Peptide abundance, 10-log: logarthmic (base 10) pe…
#	Genes	Accnrs	Descriptions	Peptide sequence	Assignment	peptide abundance, 10-log	HAPMAP	max(prot)
1	HBD; HBB	P02042; P68871	Hemoglobin subunit delta; Hemoglobin subunit beta	LLVVYPWTQR	Blank	10.0194	HAP	10.0194	Blank	68
2	HBD; HBB	P02042; P68871	Hemoglobin subunit delta; Hemoglobin subunit beta	VLGAFSDGLAHLDNLK	Blank	9.7077	HAP	10.0194	GBM	12
3	HBD; HBB	P02042; P68871	Hemoglobin subunit delta; Hemoglobin subunit beta	VVAGVANALAHK	GBM|Donor	9.179	HAP	10.0194	Donor	13
4	HBD; HBB	P02042; P68871	Hemoglobin subunit delta; Hemoglobin subunit beta	KVLGAFSDGLAHLDNLK	GBM|Donor	8.96802	HAP	10.0194	GBM|Donor	34
5	HBD; HBB	P02042; P68871	Hemoglobin subunit delta; Hemoglobin subunit beta	VHLTPEEK	Blank	8.95635	HAP	10.0194		127
6	HBD; HBB	P02042; P68871	Hemoglobin subunit delta; Hemoglobin subunit beta	LHVDPENFR	Blank	8.58474	HAP	10.0194
7	HBB	P68871	Hemoglobin subunit beta	VNVDEVGGEALGR	Blank	9.62827	HAP	9.62827
8	HBB	P68871	Hemoglobin subunit beta	FFESFGDLSTPDAVMGNPK	Blank	9.58758	HAP	9.62827	HAP	47
9	HBB	P68871	Hemoglobin subunit beta	SAVTALWGK	GBM|Donor	9.37244	HAP	9.62827	MAP	9
10	HBB	P68871	Hemoglobin subunit beta	LLGNVLVCVLAHHFGK	Blank	8.8984	HAP	9.62827		56
11	HBB	P68871	Hemoglobin subunit beta	GTFATLSELHCDK	Blank	8.85788	HAP	9.62827
12	HBB	P68871	Hemoglobin subunit beta	LLGNVLVCVLAHHFGKEFTPPVQAAYQK	Blank	8.84511	HAP	9.62827
13	HBB	P68871	Hemoglobin subunit beta	EFTPPVQAAYQK	Blank	8.82288	HAP	9.62827
14	HBA1	P69905	Hemoglobin subunit alpha	LLSHCLLVTLAAHLPAEFTPAVHASLDKFLASVSTVLTSK	Blank	9.57634	HAP	9.57634
15	HBA1	P69905	Hemoglobin subunit alpha	MFLSFPTTK	Blank	9.50636	HAP	9.57634
16	HBA1	P69905	Hemoglobin subunit alpha	VADALTNAVAHVDDMPNALSALSDLHAHK	Blank	9.4345	HAP	9.57634
17	HBA1	P69905	Hemoglobin subunit alpha	TYFPHFDLSHGSAQVK	Blank	9.30396	HAP	9.57634
18	HBA1	P69905	Hemoglobin subunit alpha	VGAHAGEYGAEALER	Blank	9.2525	HAP	9.57634
19	HBA1	P69905	Hemoglobin subunit alpha	KVADALTNAVAHVDDMPNALSALSDLHAHK	Blank	8.78239	HAP	9.57634
20	HBA1	P69905	Hemoglobin subunit alpha	VDPVNFK	Blank	8.40743	HAP	9.57634
21	HBA1	P69905	Hemoglobin subunit alpha	LRVDPVNFK	Blank	7.9091	HAP	9.57634
22	TUBA4A; TUBA1A; TUBA8	P68366; Q71U36; Q9NY65	Tubulin alpha-4A chain; Tubulin alpha-1A chain; Tubulin alpha-8 chain	VGINYQPPTVVPGGDLAK	Blank	8.93326	---	8.93326
23	TUBB; TUBB4B; TUBB3; TUBB2A; TUBB2B	P07437; P68371; Q13509; Q13885; Q9BVA1	Tubulin beta chain; Tubulin beta-4B chain; Tubulin beta-3 chain; Tubulin beta-2A chain; Tubulin beta-2B chain	GHYTEGAELVDSVLDVVR	Donor	8.79185	---	8.79185
24	ACTB; ACTC1	P60709; P68032	Actin, cytoplasmic 1; Actin, alpha cardiac muscle 1	SYELPDGQVITIGNER	Blank	8.76805	---	8.76805
25	TUBA4A; TUBA1A	P68366; Q71U36	Tubulin alpha-4A chain; Tubulin alpha-1A chain	IHFPLATYAPVISAEK	GBM|Donor	8.72691	---	8.72691
26	ACTB	P60709	Actin, cytoplasmic 1	VAPEEHPVLLTEAPLNPK	Blank	8.59847	---	8.59847
27	ACTB	P60709	Actin, cytoplasmic 1	DLYANTVLSGGTTMYPGIADR	GBM|Donor	8.03838	---	8.59847
28	ACTB	P60709	Actin, cytoplasmic 1	GYSFTTTAER	Blank	8.01198	---	8.59847
29	TUBB; TUBB3; TUBB2A; TUBB2B	P07437; Q13509; Q13885; Q9BVA1	Tubulin beta chain; Tubulin beta-3 chain; Tubulin beta-2A chain; Tubulin beta-2B chain	AILVDLEPGTMDSVR	GBM|Donor	8.54135	---	8.54135
30	ENO1; ENO2	P06733; P09104	Alpha-enolase; Gamma-enolase	AAVPSGASTGIYEALELR	Blank	8.51889	---	8.51889
31	ALB	P02768	Albumin	DAHKSEVAHRFK	Donor	NA	HAP	8.48095
32	ALB	P02768	Albumin	DAHKSEVAHR	GBM|Donor	NA	HAP	8.48095
33	ALB	P02768	Albumin	VFDEFKPLVEEPQNLIK	Blank	8.48095	HAP	8.48095
34	ALB	P02768	Albumin	KVPQVSTPTLVEVSR	Blank	8.23478	HAP	8.48095
35	ALB	P02768	Albumin	LVNEVTEFAK	Blank	7.99371	HAP	8.48095
36	ALB	P02768	Albumin	HPYFYAPELLFFAK	Blank	7.63632	HAP	8.48095
37	ALB	P02768	Albumin	TCVADESAENCDK	Blank	7.62316	HAP	8.48095
38	ALB	P02768	Albumin	SLHTLFGDK	GBM|Donor	7.50839	HAP	8.48095
39	ALB	P02768	Albumin	VPQVSTPTLVEVSR	Blank	7.40352	HAP	8.48095
40	ALB	P02768	Albumin	HPDYSVVLLLR	Blank	7.26645	HAP	8.48095
41	ALB	P02768	Albumin	LKECCEKPLLEK	GBM|Donor	7.04582	HAP	8.48095
42	ALB	P02768	Albumin	ADDKETCFAEEGKK	Blank	6.74501	HAP	8.48095
43	ALB	P02768	Albumin	KLVAASQAALGL	GBM|Donor	6.24204	HAP	8.48095
44	ALB	P02768	Albumin	LCTVATLR	Blank	5.29834	HAP	8.48095
45	MBP	P02686	Myelin basic protein	TQDENPVVHFFK	Blank	8.45018	---	8.45018
46	MBP	P02686	Myelin basic protein	YLATASTMDHAR	Blank	7.75872	---	8.45018
47	MBP	P02686	Myelin basic protein	TAHYGSLPQK	Blank	7.72736	---	8.45018
48	MBP	P02686	Myelin basic protein	DTGILDSIGR	GBM|Donor	6.67493	---	8.45018
49	PLP1	P60201	Myelin proteolipid protein	LIETYFSK	Donor	NA	---	8.43137
50	PLP1	P60201	Myelin proteolipid protein	TSASIGSLCADAR	Blank	8.43137	---	8.43137
51	PLP1	P60201	Myelin proteolipid protein	VCGSNLLSICK	Blank	8.30057	---	8.43137
52	PLP1	P60201	Myelin proteolipid protein	GLSATVTGGQK	Blank	6.42943	---	8.43137
53	PLP1	P60201	Myelin proteolipid protein	MYGVLPWNAFPGK	Blank	5.03154	---	8.43137
54	TUBA1A	Q71U36	Tubulin alpha-1A chain	AVFVDLEPTVIDEVR	GBM|Donor	8.40625	---	8.40625
55	TUBA1A	Q71U36	Tubulin alpha-1A chain	TIGGGDDSFNTFFSETGAGK	GBM|Donor	8.13167	---	8.40625
56	TUBA1A	Q71U36	Tubulin alpha-1A chain	DVNAAIATIK	GBM|Donor	7.83966	---	8.40625
57	GFAP	P14136	Glial fibrillary acidic protein	LALDIEIATYR	Blank	NA	---	8.31754
58	GFAP	P14136	Glial fibrillary acidic protein	DNLAQDLATVR	Blank	8.31754	---	8.31754
59	GFAP	P14136	Glial fibrillary acidic protein	ITIPVQTFSNLQIR	GBM|Donor	8.2713	---	8.31754
60	GFAP	P14136	Glial fibrillary acidic protein	LEAENNLAAYR	Blank	8.17883	---	8.31754
61	GFAP	P14136	Glial fibrillary acidic protein	HLQEYQDLLNVK	Blank	8.156	---	8.31754
62	GFAP	P14136	Glial fibrillary acidic protein	ALAAELNQLR	Donor	8.15143	---	8.31754
63	GFAP	P14136	Glial fibrillary acidic protein	VDFSLAGALNAGFK	Blank	8.06526	---	8.31754
64	GFAP	P14136	Glial fibrillary acidic protein	KIESLEEEIR	Donor	6.73401	---	8.31754
65	NEFL; NEFM; VIM; NEFH; INA	P07196; P07197; P08670; P12036; Q16352	Neurofilament light polypeptide; Neurofilament medium polypeptide; Vimentin; Neurofilament heavy polypeptide; Alpha-internexin	EYQDLLNVK	GBM|Donor	8.2842	---	8.2842
66	UBB	P0CG47	Polyubiquitin-B	TITLEVEPSDTIENVK	GBM|Donor	8.14054	---	8.14054
67	H4C1	P62805	Histone H4	VFLENVIR	Donor	8.10783	---	8.10783
68	H4C1	P62805	Histone H4	TVTAMDVVYALK	Blank	7.81769	---	8.10783
69	H4C1	P62805	Histone H4	DNIQGITKPAIR	Blank	7.47826	---	8.10783
70	HBD	P02042	Hemoglobin subunit delta	VNVDAVGGEALGR	Blank	8.02445	HAP	8.02445
71	HBD	P02042	Hemoglobin subunit delta	FFESFGDLSSPDAVMGNPK	GBM|Donor	8.01283	HAP	8.02445
72	HBD	P02042	Hemoglobin subunit delta	LLGNVLVCVLAR	Blank	7.51534	HAP	8.02445
73	HSPA5; HSPA8; HSPA2	P11021; P11142; P54652	Endoplasmic reticulum chaperone BiP; Heat shock cognate 71 kDa protein; Heat shock-related 70 kDa protein 2	IINEPTAAAIAYGLDK	GBM	8.00427	---	8.00427
74	GAPDH	P04406	Glyceraldehyde-3-phosphate dehydrogenase	VPTANVSVVDLTCR	Blank	7.95446	---	7.95446
75	GAPDH	P04406	Glyceraldehyde-3-phosphate dehydrogenase	VIISAPSADAPMFVMGVNHEK	Donor	6.1997	---	7.95446
76	EEF1A1	P68104	Elongation factor 1-alpha 1	VETGVLKPGMVVTFAPVNVTTEVK	Blank	7.93218	---	7.93218
77	CKB	P12277	Creatine kinase B-type	VLTPELYAELR	Blank	7.82335	---	7.82335
78	CKB	P12277	Creatine kinase B-type	LAVEALSSLDGDLAGR	GBM|Donor	7.74489	---	7.82335
79	GLUD1	P00367	Glutamate dehydrogenase 1, mitochondrial	AKPYEGSILEADCDILIPAASEK	GBM|Donor	7.71931	---	7.71931
80	GLUD1	P00367	Glutamate dehydrogenase 1, mitochondrial	HGGTIPIVPTAEFQDR	GBM|Donor	7.40572	---	7.71931
81	PRDX2	P32119	Peroxiredoxin-2	KEGGLGPLNIPLLADVTR	Blank	7.69379	---	7.69379
82	H1-3; H1-2; H1-4	P16402; P16403; P10412	Histone H1.3; Histone H1.2; Histone H1.4	ASGPPVSELITK	GBM	7.63018	---	7.63018
83	VIM	P08670	Vimentin	ILLAELEQLK	Donor	7.56082	---	7.56082
84	CALM1	P0DP23	Calmodulin-1	EAFSLFDKDGDGTITTK	GBM	7.538	---	7.538
85	MARCKS	P29966	Myristoylated alanine-rich C-kinase substrate	GEPAAAAAPEAGASPVEK	Blank	7.47049	---	7.47049
86	MARCKS	P29966	Myristoylated alanine-rich C-kinase substrate	GEAAAERPGEAAVASSPSK	Blank	6.97201	---	7.47049
87	MARCKS	P29966	Myristoylated alanine-rich C-kinase substrate	EAGEGGEAEAPAAEGGK	Blank	6.71548	---	7.47049
88	FGG	P02679	Fibrinogen gamma chain	EGFGHLSPTGTTEFWLGNEK	GBM|Donor	7.46079	MAP	7.46079
89	DPYSL2	Q16555	Dihydropyrimidinase-related protein 2	GLYDGPVCEVSVTPK	Donor	7.45217	---	7.45217
90	ATP5F1A	P25705	ATP synthase subunit alpha, mitochondrial	TGAIVDVPVGEELLGR	GBM|Donor	7.39183	---	7.39183
91	LDHB	P07195	L-lactate dehydrogenase B chain	LIAPVAEEEATVPNNK	GBM|Donor	7.37411	---	7.37411
92	CRYAB	P02511	Alpha-crystallin B chain	HFSPEELK	GBM|Donor	7.36083	---	7.36083
93	CRYAB	P02511	Alpha-crystallin B chain	EEKPAVTAAPK	Blank	6.84117	---	7.36083
94	IGKC	P01834	Immunoglobulin kappa constant	VYACEVTHQGLSSPVTK	Donor	7.33679	HAP	7.33679
95	PARK7	Q99497	Parkinson disease protein 7	EGPYDVVVLPGGNLGAQNLSESAAVK	Blank	7.33339	---	7.33339
96	CNP	P09543	2',3'-cyclic-nucleotide 3'-phosphodiesterase	NQWQLSADDLK	GBM	7.32875	---	7.32875
97	PFN1	P07737	Profilin-1	TFVNITPAEVGVLVGK	Blank	7.32734	---	7.32734
98	PKM	P14618	Pyruvate kinase PKM	TATESFASDPILYRPVAVALDTK	Blank	7.25823	---	7.25823
99	PKM	P14618	Pyruvate kinase PKM	KGVNLPGAAVDLPAVSEK	GBM|Donor	7.14626	---	7.25823
100	ENO2	P09104	Gamma-enolase	AVDHINSTIAPALISSGLSVVEQEK	Blank	7.20018	---	7.20018
101	HP	P00738	Haptoglobin	DIAPTLTLYVGK	Blank	7.19398	HAP	7.19398
102	SOD1	P00441	Superoxide dismutase [Cu-Zn]	GDGPVQGIINFEQK	GBM|Donor	7.18861	---	7.18861
103	BASP1	P80723	Brain acid soluble protein 1	AEPPKAPEQEQAAPGPAAGGEAPK	GBM	7.08332	---	7.08332
104	BASP1	P80723	Brain acid soluble protein 1	ETPAATEAPSSTPK	Blank	6.94702	---	7.08332
105	BASP1	P80723	Brain acid soluble protein 1	AQGPAASAEEPKPVEAPAANSDQTVTVK	GBM	6.58048	---	7.08332
106	RPLP2	P05387	60S acidic ribosomal protein P2	LASVPAGGAVAVSAAPGSAAPAAGSAPAAAEEK	Blank	7.01118	---	7.01118
107	STXBP1	P61764	Syntaxin-binding protein 1	REPLPSLEAVYLITPSEK	GBM	6.9565	---	6.9565
108	TF	P02787	Serotransferrin	SVIPSDGPSVACVK	GBM	6.84043	HAP	6.84043
109	PPP2R1A	P30153	Serine/threonine-protein phosphatase 2A 65 kDa regulatory subunit A alpha isoform	IGPILDNSTLQSEVKPILEK	Donor	6.79415	---	6.79415
110	A2M	P01023	Alpha-2-macroglobulin	VGFYESDVMGR	GBM|Donor	NA	HAP	6.01684
111	A2M	P01023	Alpha-2-macroglobulin	VGFYESDVMGRGHAR	GBM|Donor	NA	HAP	6.01684
112	A2M	P01023	Alpha-2-macroglobulin	AIGYLNTGYQR	GBM	6.01684	HAP	6.01684
113	GAP43	P17677	Neuromodulin	KGEGTTTAEAAPATGSKPDEPGK	Blank	6.00616	---	6.00616
114	CEP290	O15078	Centrosomal protein of 290 kDa	LKEALKTSK	Blank	NA	---	0
115	IGHG1	P01857	Immunoglobulin heavy constant gamma 1	VDKKVEPK	Blank	NA	HAP	0
116	IGHG1	P01857	Immunoglobulin heavy constant gamma 1	VSNKALPAPIEK	Blank	NA	HAP	0
117	IGHG1	P01857	Immunoglobulin heavy constant gamma 1	VSNKALPAPIEKTISK	Blank	NA	HAP	0
118	C4B	P0C0L5	Complement C4-B	GLEEELQFSLGSKINVK	Donor	NA	MAP	0
119	KNG1	P01042	Kininogen-1	HDWGHEK	Donor	NA	MAP	0
120	KNG1	P01042	Kininogen-1	RHDWGHEKQR	GBM	NA	MAP	0
121	STATH	P02808	Statherin	RIGRFGYGYGPYQPVPEQPLYPQPYQPQYQQYTF	GBM	NA	---	0
122	ZNF366	Q8N895	Zinc finger protein 366	MQKEMKMIK	GBM	NA	---	0
123	C4B	P0C0L5	Complement C4-B	NGFKSHALQLNNR	GBM|Donor	NA	MAP	0
124	C4B	P0C0L5	Complement C4-B	NGFKSHALQLNNRQIR	GBM|Donor	NA	MAP	0
125	C4B	P0C0L5	Complement C4-B	SHALQLNNRQIR	GBM|Donor	NA	MAP	0
126	KNG1	P01042	Kininogen-1	HDWGHEKQR	GBM|Donor	NA	MAP	0
127	KNG1	P01042	Kininogen-1	RPPGFSPFR	GBM|Donor	NA	MAP	0
